# Supplementary material for: Gastrointestinal Biomarkers and Their Association with Feeding in the First Five Days of Pediatric Critical Illness
Source: PubMed Central journal article supplement (PMC10642702; doi:10.1097/mpg.0000000000003950), 2023-09-20
Supplement: mpg-77-0811-s003.pdf [file mpg-77-0811-s003.pdf]

A: course of PYY

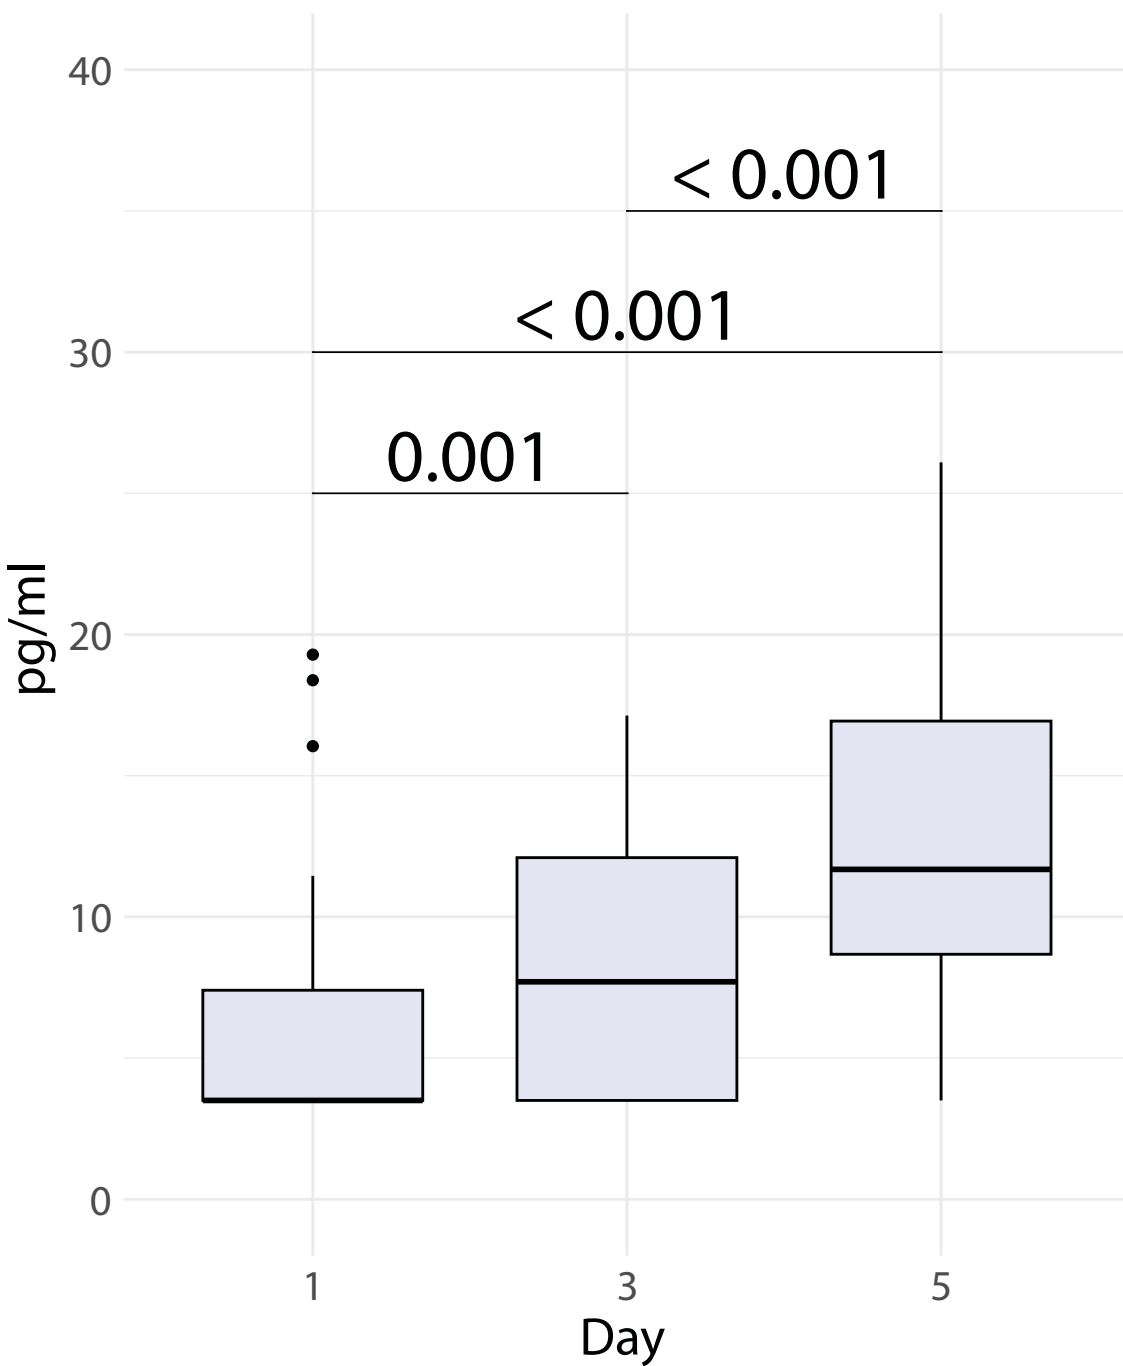

B: PYY early-PN vs. late-PN

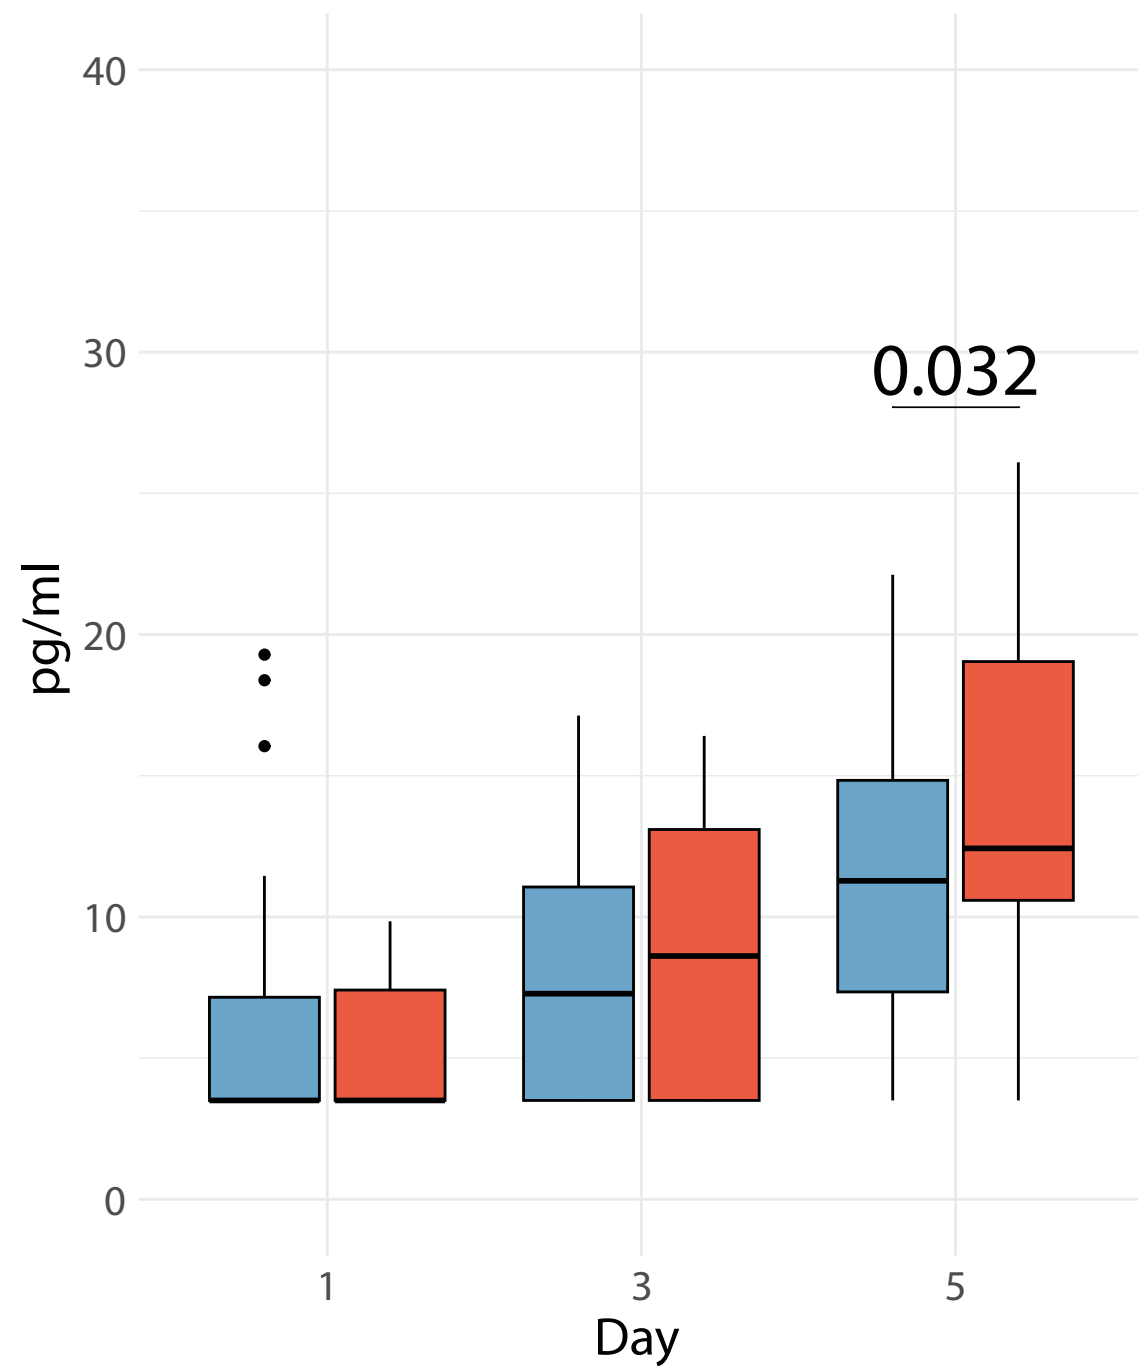

Randomisation     Early-PN     Late-PN
