# Supplementary material for: Gastrointestinal Biomarkers and Their Association with Feeding in the First Five Days of Pediatric Critical Illness
Source: PubMed Central journal article supplement (PMC10642702; doi:10.1097/mpg.0000000000003950), 2023-09-20
Supplement: mpg-77-0811-s004.pdf [file mpg-77-0811-s004.pdf]

| Biomarker         | Admission |                   | Day 3 |                   | Day 5 |                   |
|-------------------|-----------|-------------------|-------|-------------------|-------|-------------------|
|                   | n         | concentration     | n     | concentration     | n     | concentration     |
| CCK pg/mL         | 161       | 19.1 (14.6; 25.7) | 93    | 28.2 (17.7; 39.4) | 66    | 20.5 (15.0; 25.8) |
| Leptin µg/L       | 162       | 1.5 (0.7; 5.4)    | 93    | 2.5 (0.7; 9.6)    | 64    | 2.5 (1.3; 7.6)    |
| Glucagon pmol/L   | 139       | 0.9 (0.5; 4.5)    | 79    | 5.7 (2.3; 12.2)   | 58    | 8.9 (3.8; 16.0)   |
| I-FABP2 pg/mL     | 163       | 1627 (756; 3491)  | 94    | 363 (171; 706)    | 66    | 489 (191; 850)    |
| Citrulline µmol/L | 97        | 11.7 (7.7; 17.5)  | 85    | 11.8 (8.9; 16.8)  | 57    | 12.9 (10.5; 18.5) |
| % EN of pREE      | 164       | 0 (0; 0)          | 94    | 14.5 (0.0; 43.8)  | 66    | 28.0 (7.6; 94.8)  |

**Table, Supplemental Digital Content 4. The concentrations of the GI biomarkers CCK, leptin, glucagon, I-FABP2, citrulline and the enteral nutrition intake per day for all patients**

Concentrations are shown as median (Q1; Q3).

CCK: cholecystokinin, EN: enteral nutrition, I-FABP2: Intestinal fatty-acid binding protein 2, pREE: predicted resting energy expenditure
