# Supplementary material for: Gastrointestinal Biomarkers and Their Association with Feeding in the First Five Days of Pediatric Critical Illness
Source: PubMed Central journal article supplement (PMC10642702; doi:10.1097/mpg.0000000000003950), 2023-09-20
Supplement: mpg-77-0811-s005.pdf [file mpg-77-0811-s005.pdf]

| Biomarker         | Day 3             |                   |         | Day 5             |                   |         |
|-------------------|-------------------|-------------------|---------|-------------------|-------------------|---------|
|                   | FIS (n=19)        | No FIS (n=75)     | P-value | FIS (n=14)        | No FIS (n=52)     | P-value |
| CCK pg/mL         | 19.9 (14.0; 28.2) | 30.2 (22.2; 40.0) | 0.012   | 23.2 (13.5; 31.2) | 20.3 (15.2; 25.6) | 0.88    |
| I-FABP2 pg/mL     | 487 (156; 772)    | 363 (171; 680)    | 0.95    | 399 (198; 816)    | 510 (205; 850)    | 0.70    |
| Leptin µg/L       | 2.1 (0.7; 2.7)    | 3.3 (0.7; 10.4)   | 0.15    | 2.6 (0.7; 6.9)    | 2.5 (1.3; 7.8)    | 0.86    |
| Glucagon pmol/L   | 5.6 (3.3; 8.0)    | 6.0 (2.2; 15.9)   | 0.57    | 3.9 (2.1; 13.7)   | 9.8 (6.3; 16.1)   | 0.11    |
| Citrulline µmol/L | 11.8 (8.2; 18.0)  | 11.9 (9.0; 16.2)  | 0.83    | 17.2 (10.3; 26.2) | 12.8 (10.7; 18.3) | 0.42    |
| PYY pg/ml         | 9.9 (3.5; 11.2)   | 8.1 (3.5; 13.6)   | 0.46    | 11.5 (7.6; 13.5)  | 11.9 (7.7; 17.7)  | 0.42    |
| % EN of pREE      | 12.5 (10.3; 58.0) | 16.9 (0; 43.7)    | 0.31    | 23.2 (8.7; 27.3)  | 38.0 (2.6; 101.1) | 0.18    |

**Table, Supplemental Digital Content 5.** The biomarker concentrations for patients without and with FI symptoms (vomiting/aspiration or large GRV) on admission, day 3, and on day 5, and the statistical differences as tested with the Mann-Whitney U test.

Data are median (Q1; Q3).

CCK: cholecystokinin, EN: enteral nutrition, FIS: feeding intolerance symptoms, I-FABP2: Intestinal fatty-acid binding protein 2, pREE: predicted resting energy expenditure
