# Supplementary material for: Gastrointestinal Biomarkers and Their Association with Feeding in the First Five Days of Pediatric Critical Illness
Source: PubMed Central journal article supplement (PMC10642702; doi:10.1097/mpg.0000000000003950), 2023-09-20
Supplement: mpg-77-0811-s006.pdf [file mpg-77-0811-s006.pdf]

| Characteristic                 | FIS on day 3 or 5 (n=31) | Never FIS (n=92)  |
|--------------------------------|--------------------------|-------------------|
| Randomisation group: Early-PN  | 19 (61%)                 | 48 (52%)          |
| Age in years                   | 9.3 (7.5; 14.4)          | 10,6 (4.8; 13,9)  |
| Sex: Male                      | 16 (52%)                 | 51 (55%)          |
| STRONGkids category: high risk | 1 (3%)                   | 9 (10%)           |
| <b>Diagnostic group</b>        |                          |                   |
| <b>Surgical</b>                |                          |                   |
| <b>Cardiac</b>                 | 1 (3%)                   | 7 (8%)            |
| <b>Neuro</b>                   | 12 (39%)                 | 18 (20%)          |
| <b>Abdominal</b>               | 0 (0%)                   | 5 (5%)            |
| <b>Other</b>                   | 8 (26%)                  | 21 (23%)          |
| <b>Medical</b>                 |                          |                   |
| <b>Cardiac</b>                 | 2 (6%)                   | 6 (7%)            |
| <b>Neuro</b>                   | 1 (3%)                   | 9 (10%)           |
| <b>Respiratory</b>             | 3 (10%)                  | 14 (15%)          |
| <b>Other</b>                   | 4 (13%)                  | 12 (13%)          |
| <b>PIM3 score</b>              | -2,6 (-3.1; -1.3)        | -2.6 (-3.2; -1.0) |

**Table, Supplemental Digital Content 6. Baseline characteristics of patients with and without FIS**

Data are no. (%) or median (Q1; Q3)

FIS: feeding intolerance symptoms, PEPaNIC: Early versus Late Parenteral Nutrition in the Pediatric Intensive Care Unit, PIM3: Pediatric Index of Mortality, PN: parenteral nutrition, STRONGkids: Screening Tool for Risk on Nutritional Status and Growth score, Q1: first quartile, Q3: third quartile
