# Supplementary material for: Gastrointestinal Biomarkers and Their Association with Feeding in the First Five Days of Pediatric Critical Illness
Source: PubMed Central journal article supplement (PMC10642702; doi:10.1097/mpg.0000000000003950), 2023-09-20
Supplement: mpg-77-0811-s007.pdf [file mpg-77-0811-s007.pdf]

**A: CCK**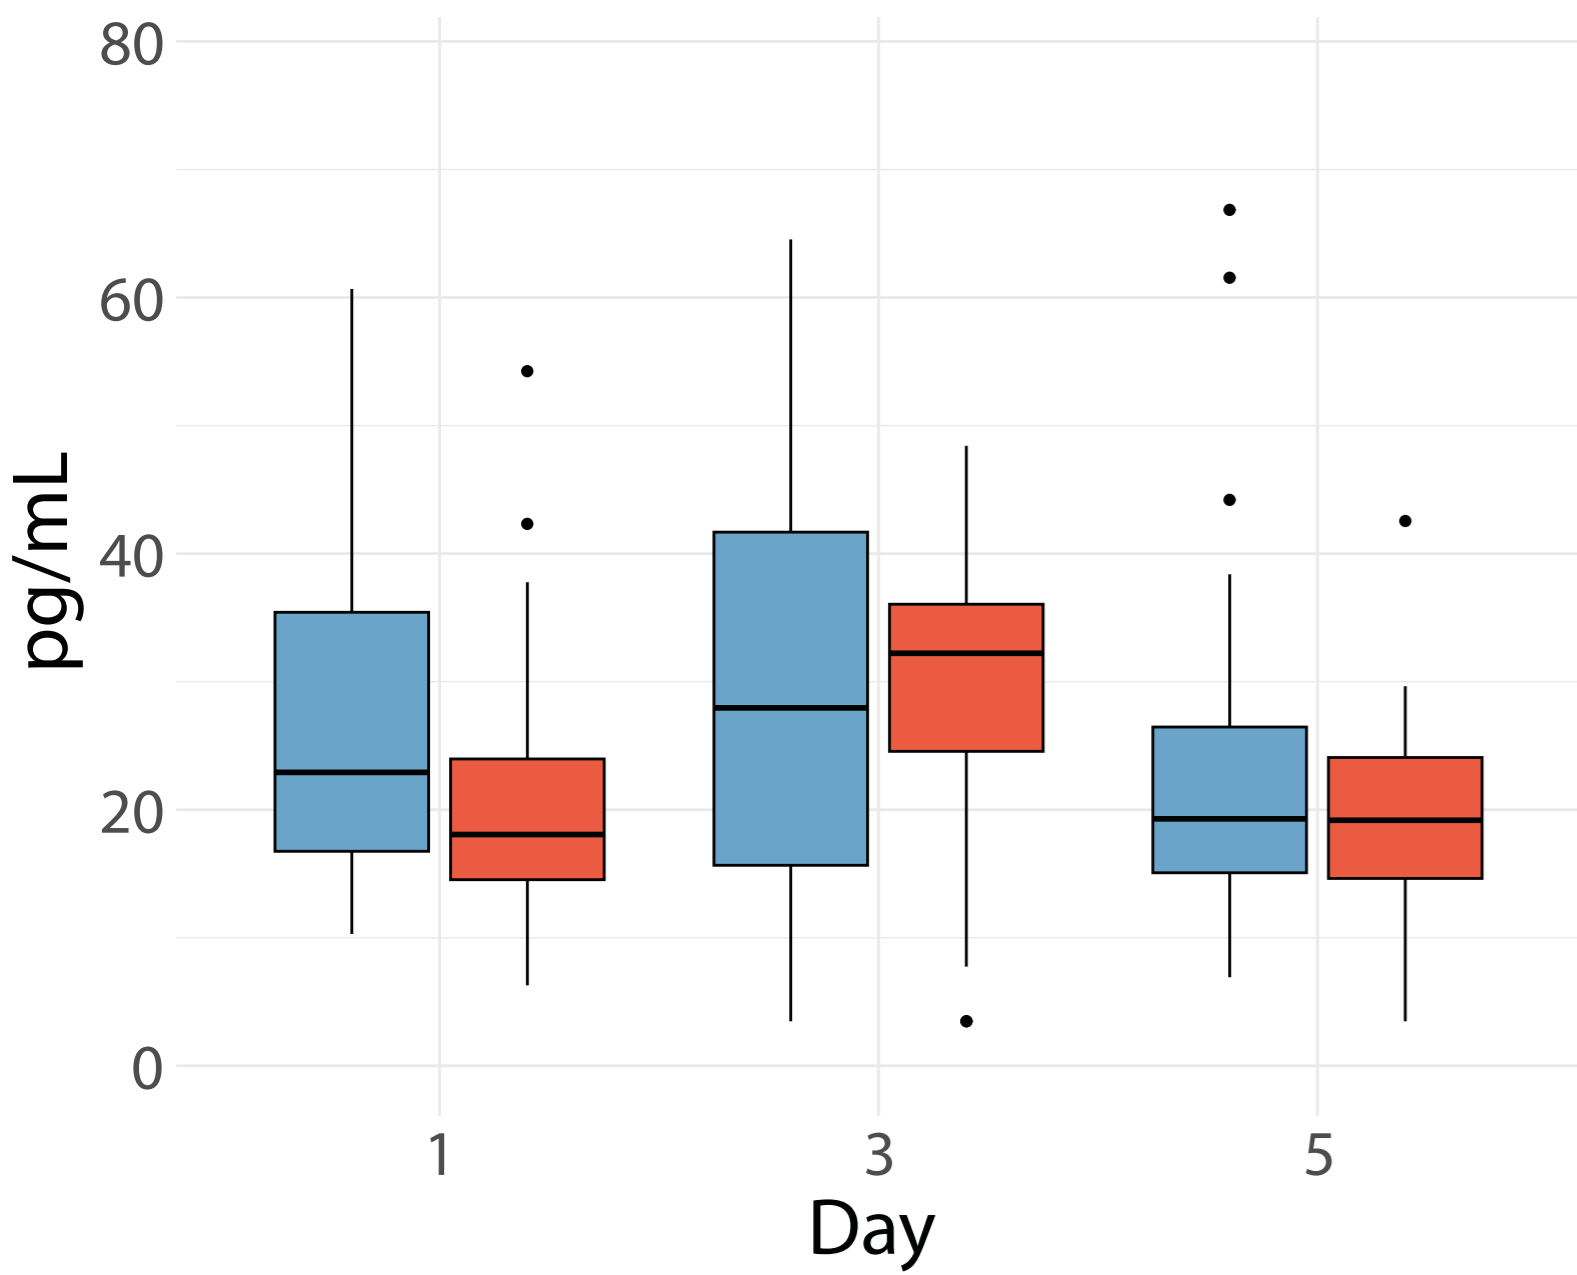**B: Leptin**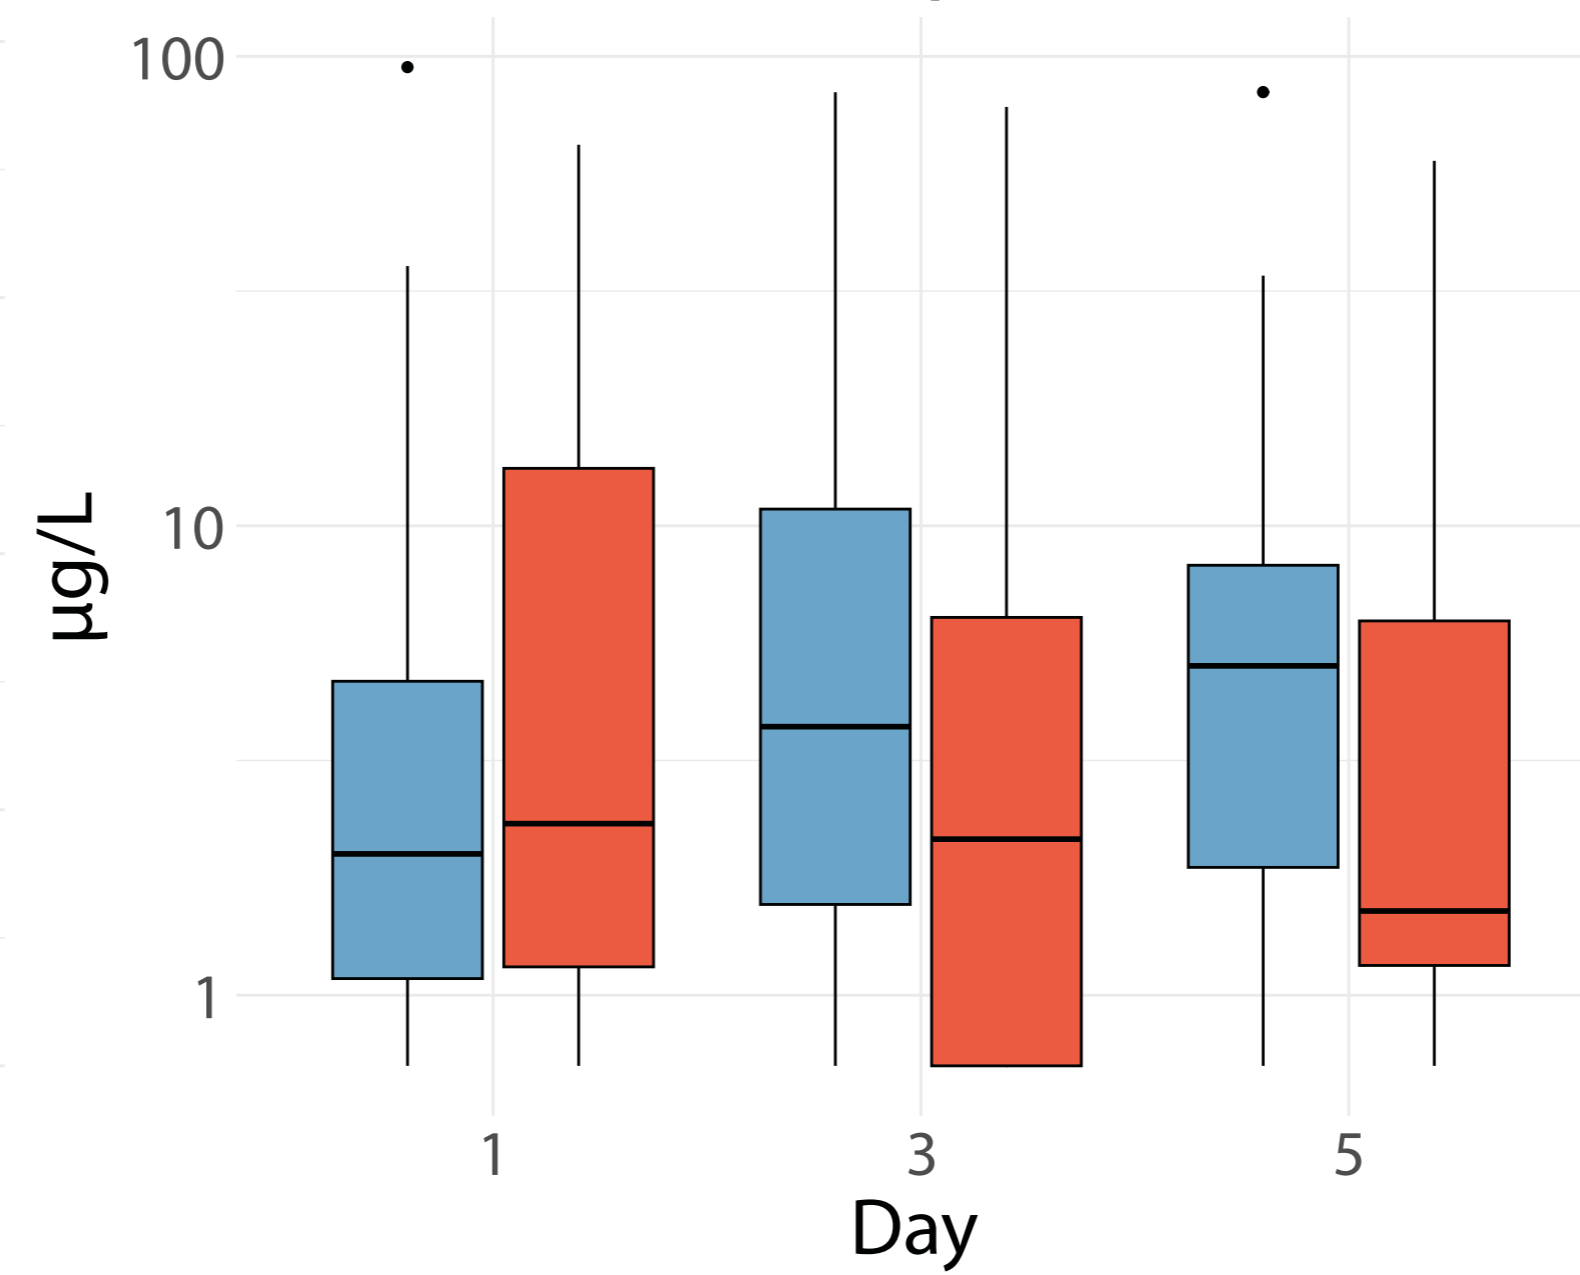**C: Glucagon**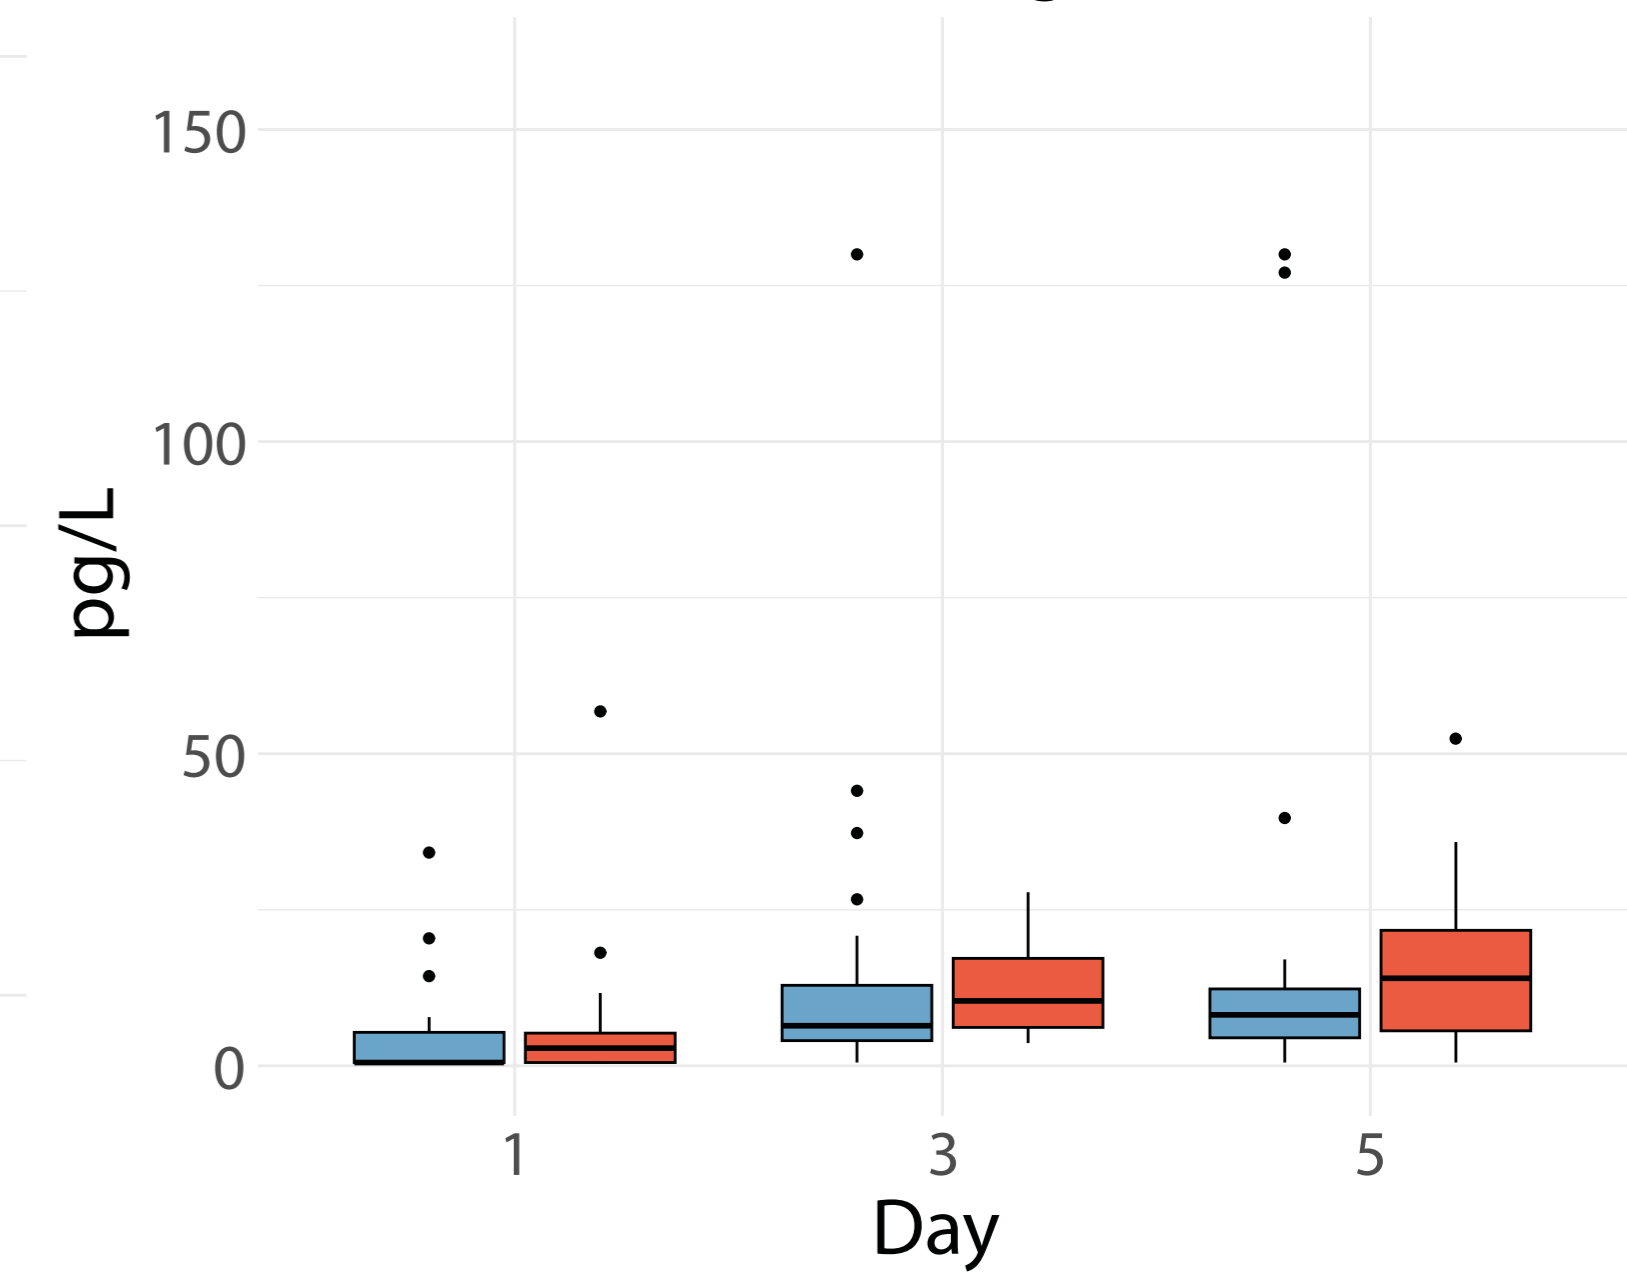**D: I-FABP2**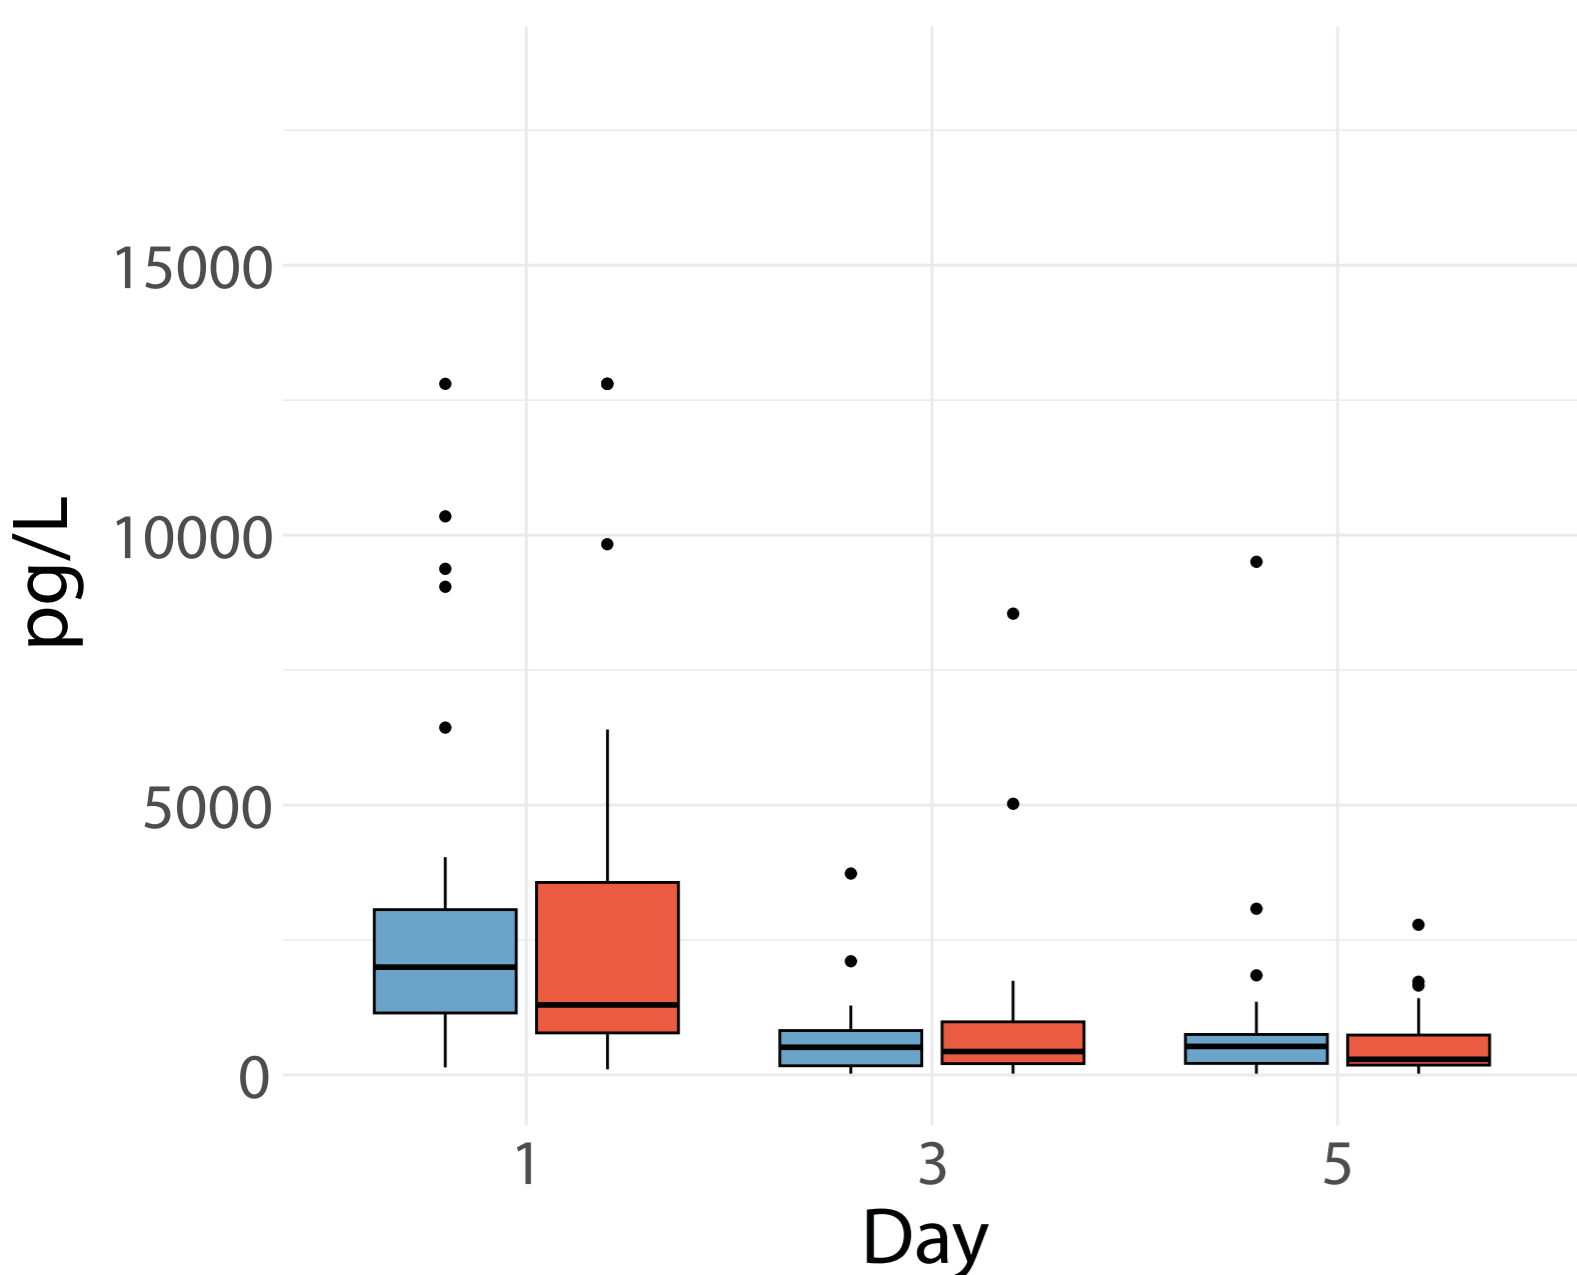**E: Citrulline**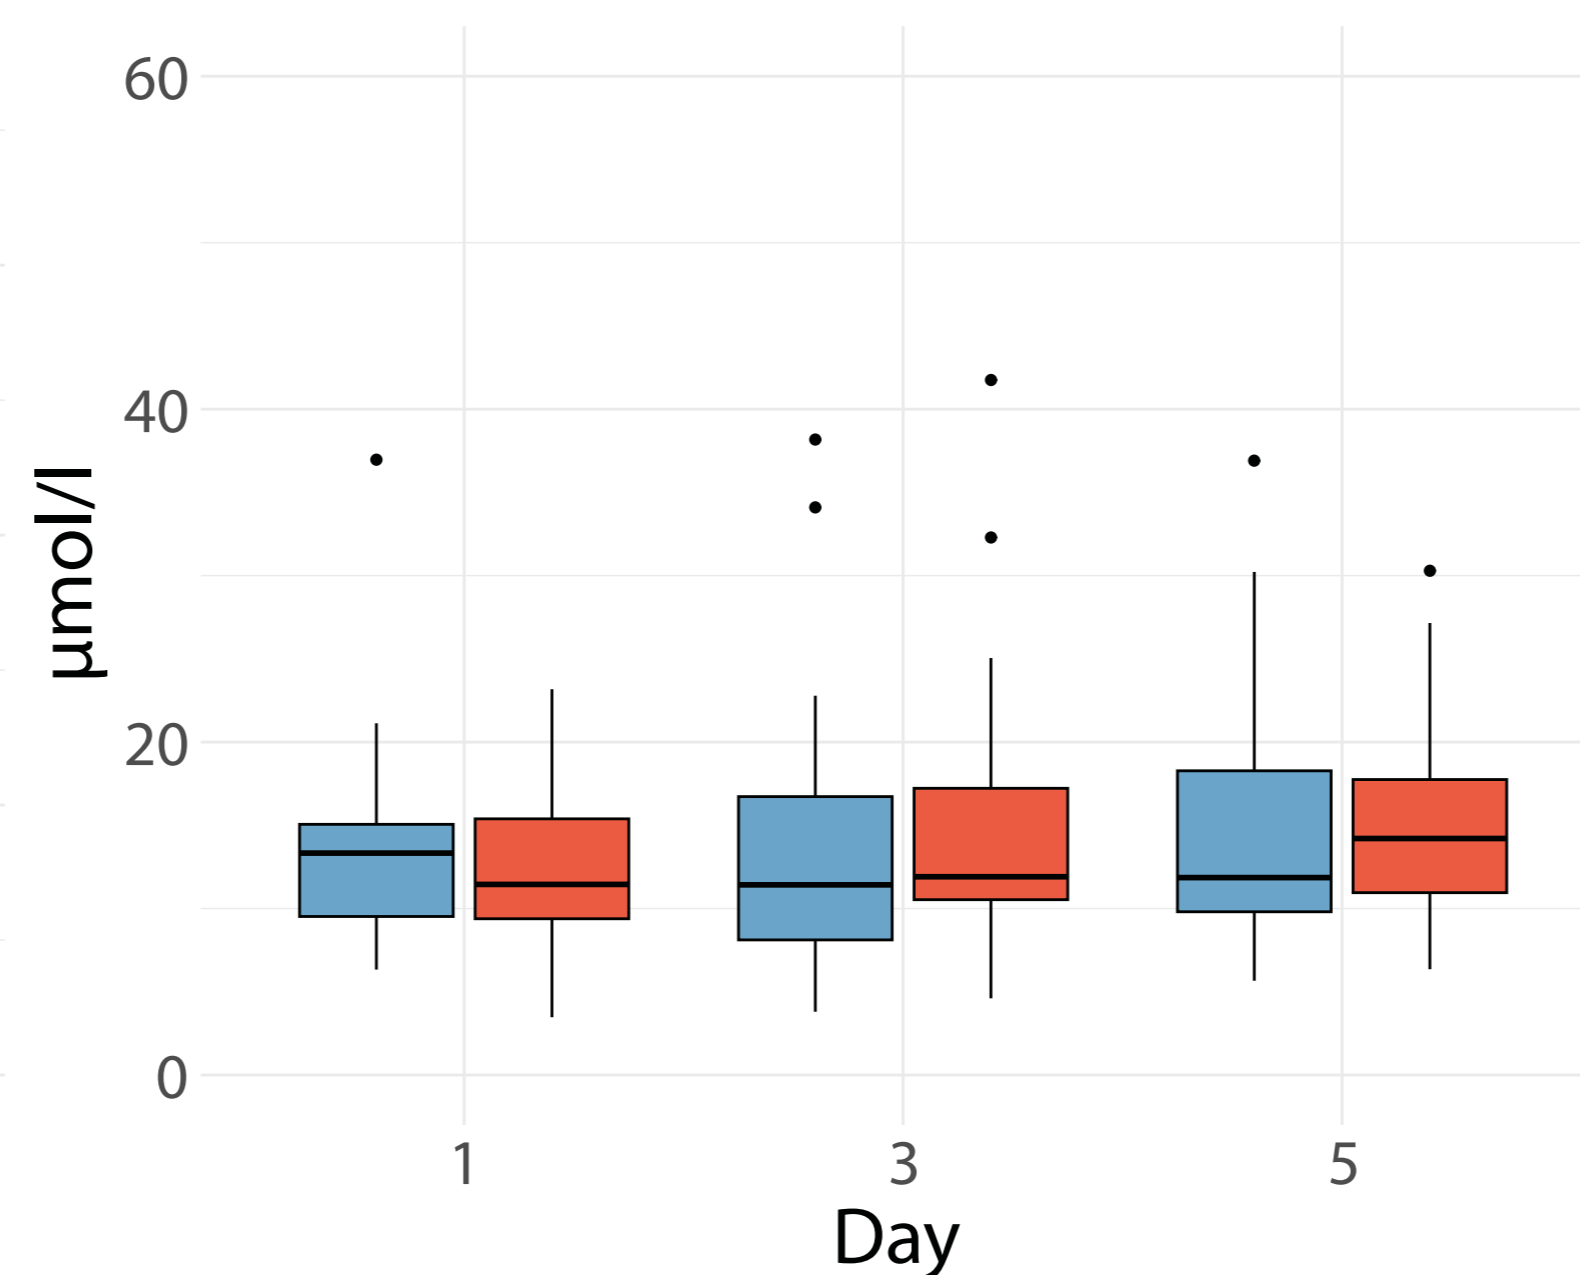**F: EN of pREE**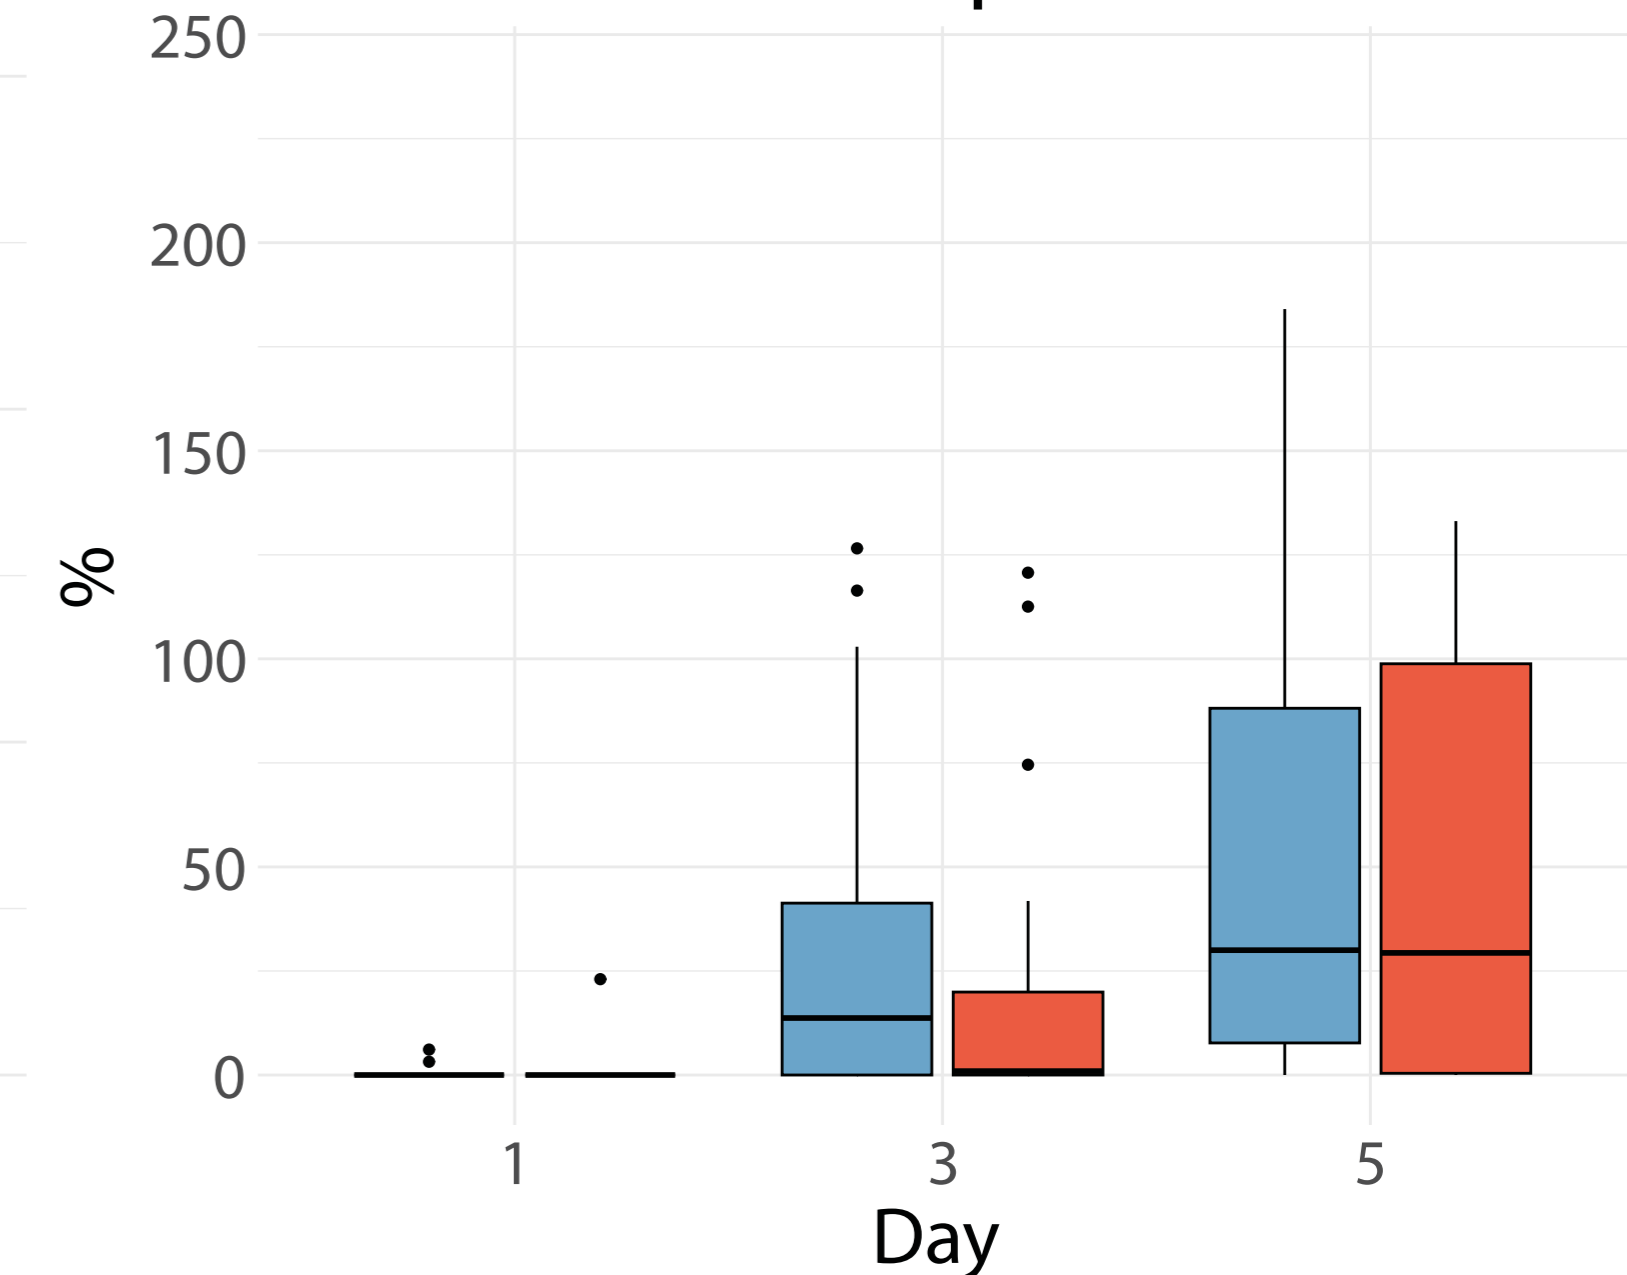

Randomisation ■ Early-PN ■ Late-PN
